# Supplementary material
Source: PubMed Central journal article supplement (PMC10802137)
Supplement: NIHMS1951709-supplement-Supporting_Information.pdf [file NIHMS1951709-supplement-Supporting_Information.pdf]

## Supporting Information

### Cell size contributes to single-cell proteome variation

Michael C. Lanz\*, Lucas Valenzuela\*, Joshua E. Elias, Jan M. Skotheim+

\*Contributed equally

+Address correspondence to [skothiem@stanford.edu](mailto:skothiem@stanford.edu)

## Table of Contents

**Figure S1.** Multiple core histones can be used to estimate cell size.

**Figure S2.** Correlation of principal components with the relative concentration of histone H4 and PGK1, a protein whose concentration is not expected to change with cell size.

**Figure S3.** Reanalysis of single cell proteomics data from Specht *et al.*

**Figure S4.** Metrics used to determine the number of reference proteins.

**Figure S5.** Impact of increasing number of reference proteins on single cell slopes.

**Figure S6.** Correlation of estimated single-cell protein slopes with the coefficients from PC2 from a PCA analysis of Brunner *et al.* as shown for PC1 in Figure 2E.

**Figure S7.** Analysis of the Brunner *et al.* dataset using HLF protein slopes from Lanz *et al.* rather than RPE1 protein slopes.

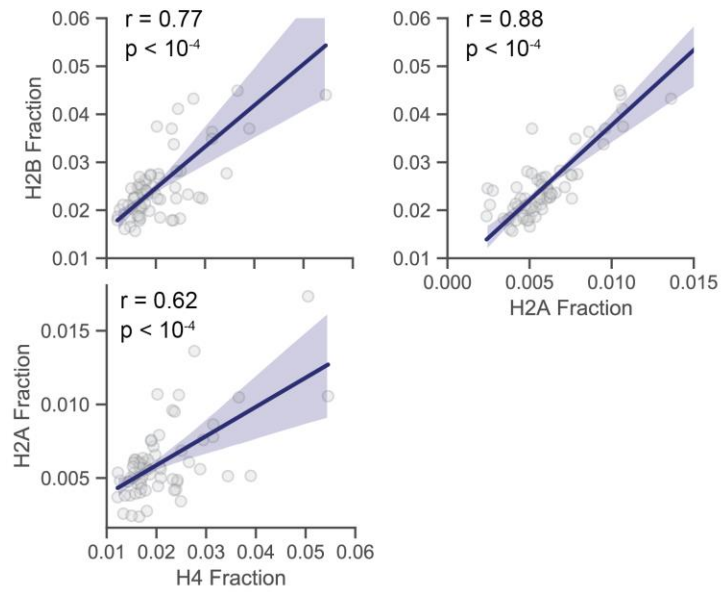

**Figure S1: Multiple core histones can be used to estimate cell size.**

The concentration of Histone H4 correlated with the concentration of other core histones in single cells. A regression line is plotted in dark blue with 95% confidence intervals. Pearson r value and its associated p-value are shown.

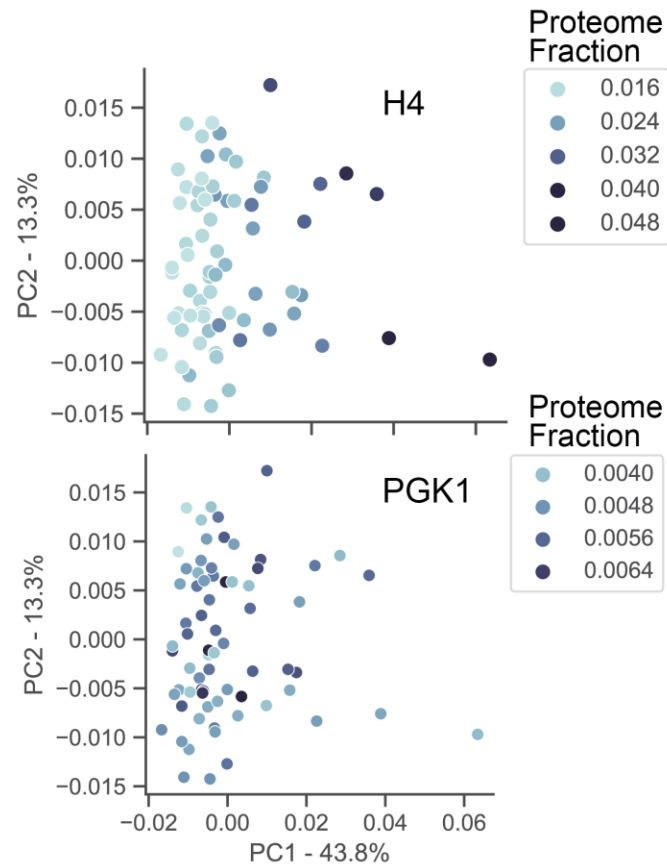

**Figure S2: Correlation of principal components with the relative concentration of histone H4 and PGK1, a protein whose concentration is not expected to change with cell size.**

Plot of the first two principal components from a PCA analysis of 70 single cell proteomes. Each dot represents the proteome of a G1 cell from Brunner *et al.* and its color indicates the fraction of the proteome represented by either H4 (top) or PGK1 (bottom).

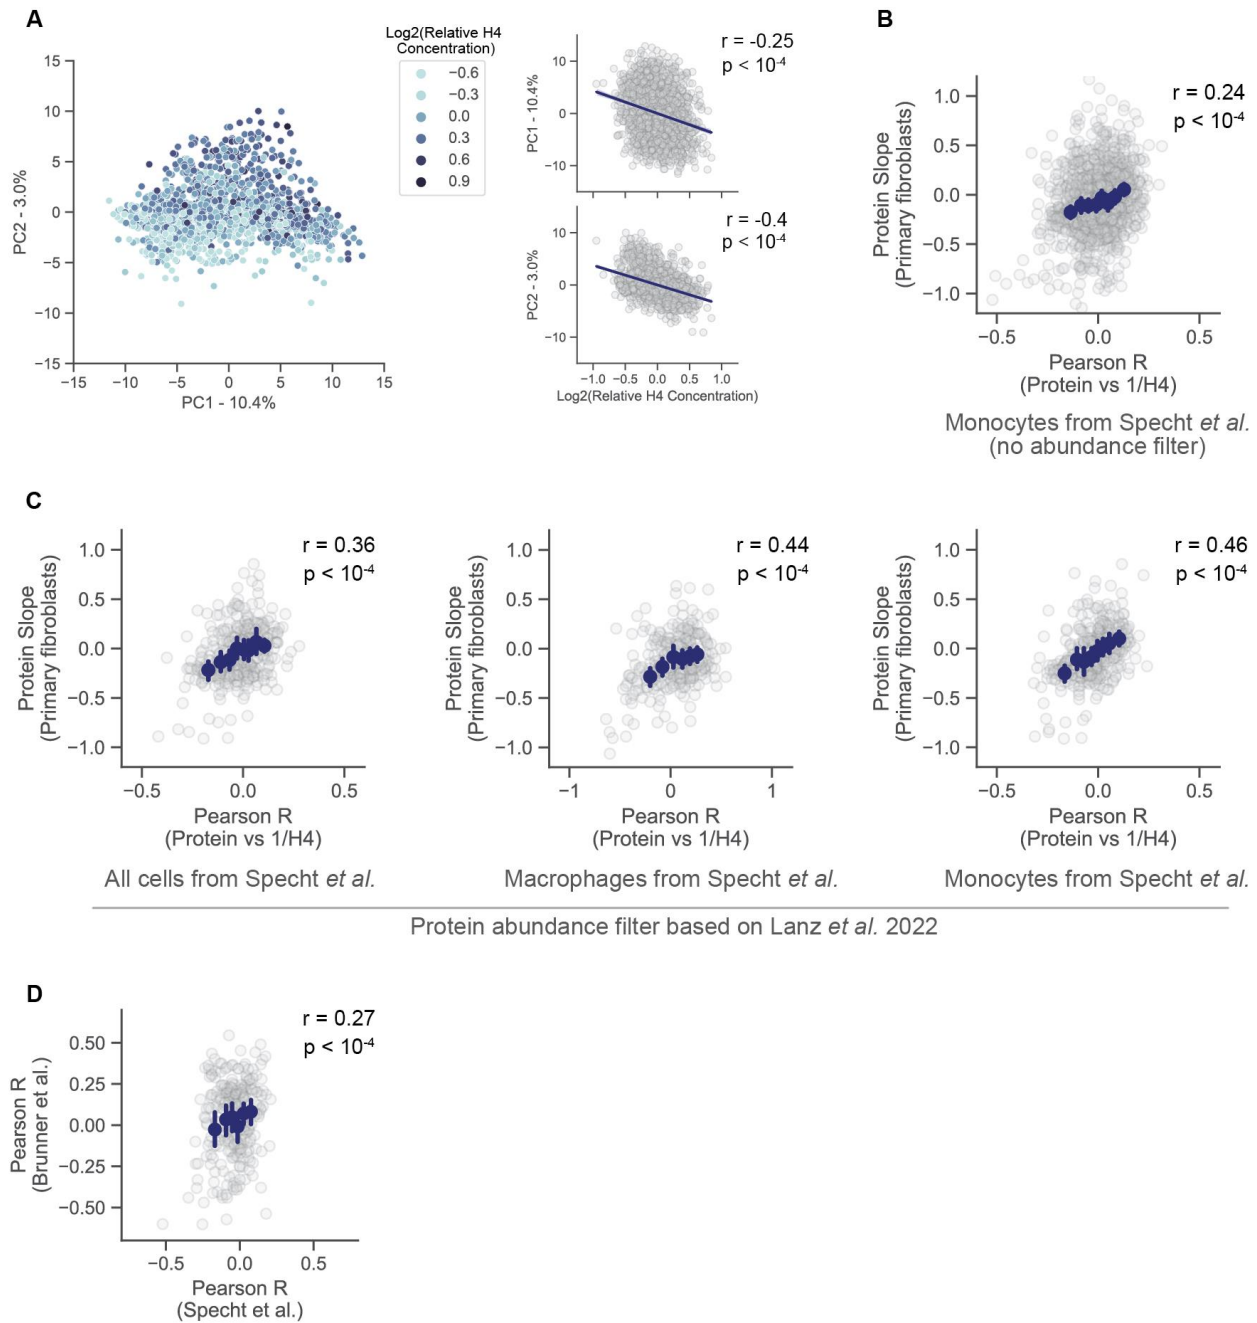

**Figure S3: Reanalysis of single cell proteomics data from Specht *et al.***

**A)** PCA analysis of 1490 single cell proteomes from Specht *et al.* Proteins were quantified using tandem mass tags, so cell size was estimated using the relative concentration of MS2-level reporter ions for Histone H4. Each dot represents a proteome and its color indicates the relative H4 concentration. Correlation between the relative histone concentrations and PC1 and PC2. A regression line is plotted in dark blue with 95% confidence intervals. Pearson  $r$  value and its associated  $p$ -value are shown.

**B)** A Pearson correlation coefficient was calculated by regressing the relative concentration of each individual protein against a proxy for each cell's size (histone H4 concentration). The  $r$  value for each protein in the Specht *et al.* dataset is plotted against the Protein Slope value (Lanz *et al.*, 2022). Histone H4 was excluded from the plot. Error bars for the binned data represent the 99% confidence interval of the mean. In Figure 1H, only the most abundant proteins are depicted. All proteins identified by Specht *et al.* are included.

**C)** The same analysis as in (B) but looking at all the different cell populations measured by Specht *et al.* The left most panel is Figure 1H. Unlike panel (B), a threshold for protein abundance is used to filter out noisy protein measurements. Error bars for the binned data represent the 99% confidence interval of the mean.

**D)** Correlation of Pearson  $r$  values (1/Histone) generated from the Specht *et al.* and Brunner *et al.* datasets.

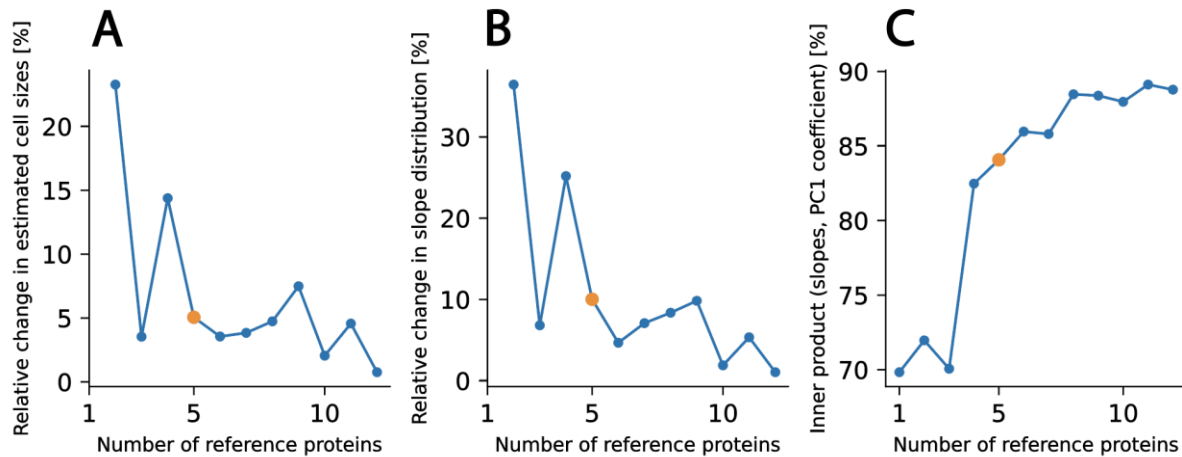

**Figure S4 – Metrics used to determine the number of reference proteins.**

The orange dot represents the number of reference proteins that is presented in the main text. Relative change denotes the value for  $n$  reference proteins minus the value for  $n-1$  reference proteins divided by value for  $n$  reference proteins.

- A)** Relative change in inferred estimated cell size distribution as more reference proteins are added.
- B)** Relative change in estimated slope distribution as more reference proteins are added.
- C)** Normalized inner product between the slopes and the PC1 coefficient as a function of the number of reference proteins. Reference proteins were discarded from the dataset before computing this metric. We chose 5 reference proteins because beyond this number changes produced only marginal differences.

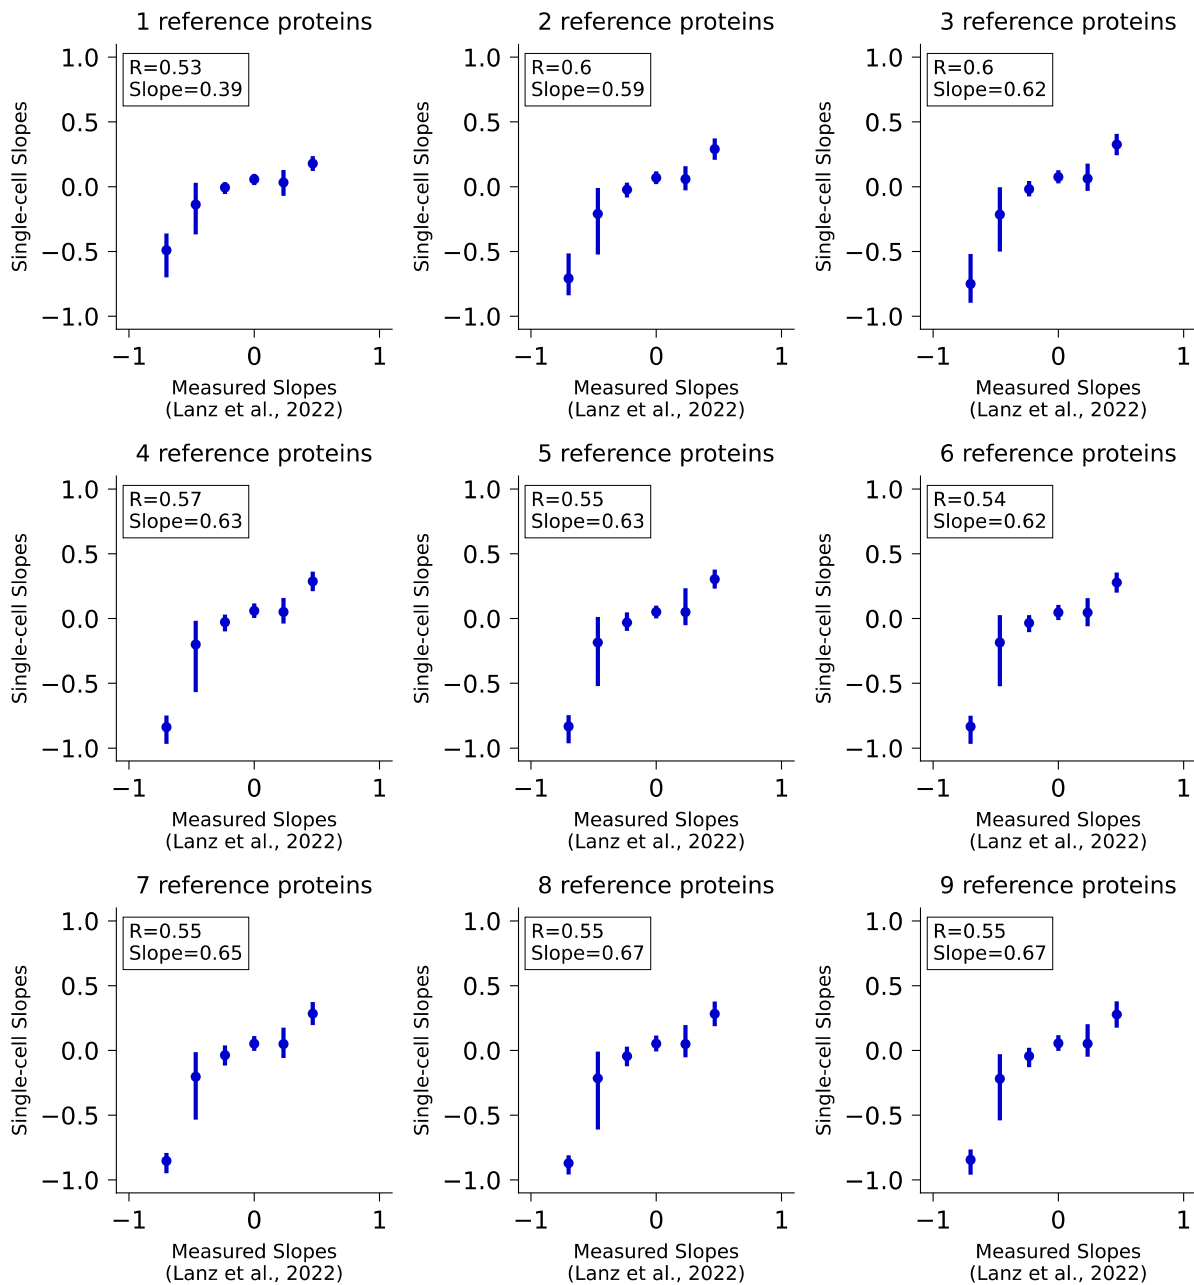

**Figure S5 – Impact of increasing number of reference proteins on single cell slopes**  
 Each panel reports the slopes estimated with a given number of reference proteins. Orange dots denote the proteins used as reference and blue dots denote binned data and associated confidence intervals.

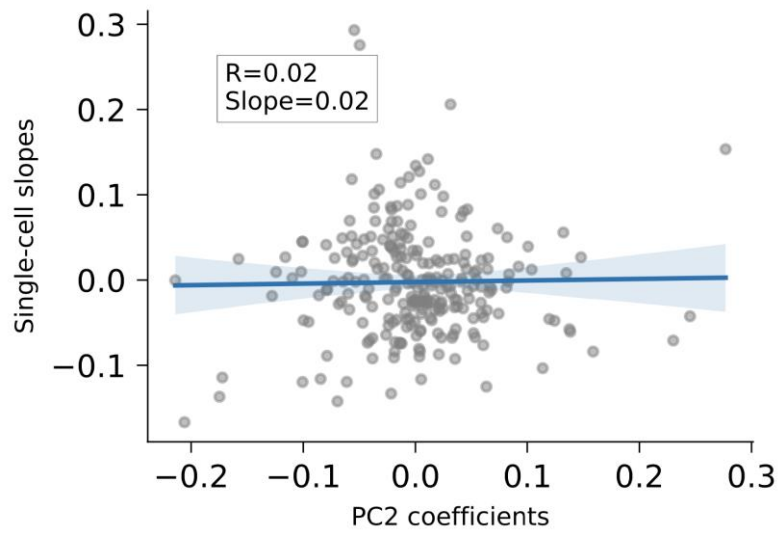

**Figure S6 – Correlation of estimated single-cell protein slopes with the coefficients from PC2 from a PCA analysis of *Brunner et al.* as shown for PC1 in Fig. 2E.**



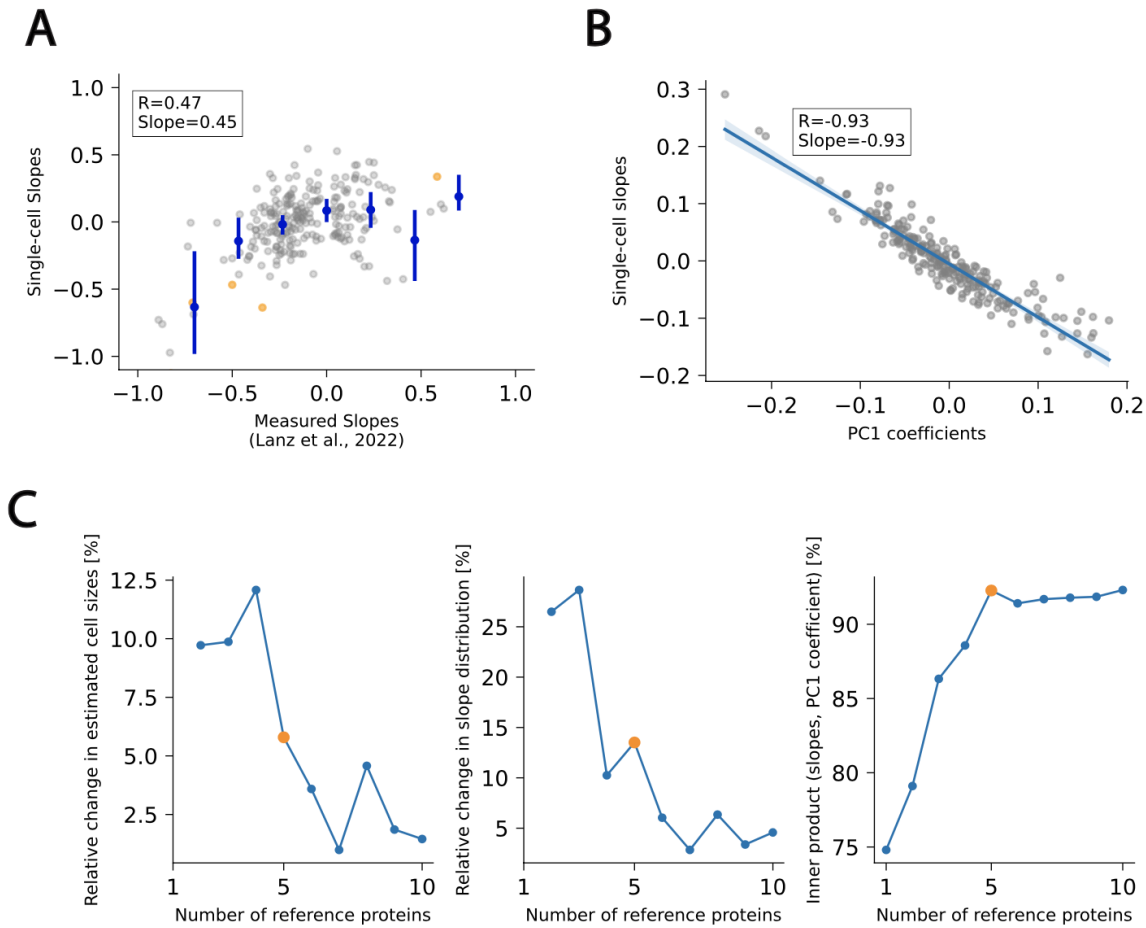

**Figure S7 – Analysis of the *Brunner et al.* dataset using HLF protein slopes from *Lanz et al.* rather than RPE1 protein slopes.**

**A)** Comparison of protein slopes estimated via the approach described in this paper and those measured in *Lanz et al.* Orange dots denote the proteins used as reference and blue dots denote binned data and associated confidence intervals.

**B)** Relationship between estimated slopes and the coefficients of the first principal component.

**C)** Relevant metrics with increasing number of reference proteins as in **Figure S4**.
